# Supplementary material for: The Metabonomic Studies of Tongue Coating in H. pylori Positive Chronic Gastritis Patients
Source: Evid Based Complement Alternat Med. 2015 Oct 19;2015:804085. doi: 10.1155/2015/804085 (PMC4629030; doi:10.1155/2015/804085)
Supplement: Supplementary file 1 — In supplement material, we showed the tongue coating different peak areas between Hp positive group (TH) and Hp negative group (TN) by GC/MS in chronic gastritis. In GC/MS +EI TIC full scan, there were many peaks in different retention times, different retention times is correspond to the different peak area. Var ID: number; Peak: mass@retention time; MEAN TH: mean TH peak area; MEAN TN: mean TN peak area [file 804085.f1.xlsx]

## Sheet: TH-TN
Var ID (Primary)	PEAK	MASS	MEAN TH	MEAN TN	TH-TN即TH比TN
593	73.0@7.504001	73	0.000124052	0.000290037
64	73.0@10.3799	73	0.000231336	8.16838e-05
512	73.0@11.9418	73	0.000162672	2.74211e-05
623	73.0@12.6107	73	7.71475e-05	0.000303819
42	43.0@9.4393	43	0.00122489	0.000927157
11	73@13.132476	73	0.0220932	0.0375766
668	73.0@14.472	73	0.000341666	5.39923e-05
799	73.0@11.7638	73	0.000312782	0.00434083
680	73.0@10.0418	73	0.000954827	0.000677735
595	73.0@9.31229	73	0.000208521	5.79851e-05
523	73.0@7.80747	73	5.86622e-05	0.000264136
321	57.0@16.8588	57	0.000112378	9.7488e-05
6	73.0@7.464011	73	0.0304464	0.041327
7	174.0@5.278531	174	0.024168	0.0120839
8	299.0@9.727366	299	0.0239028	0.0220443
9	43.0@6.1617393	43	0.0115508	0.0163891
10	147.0@9.702745	147	0.00653536	0.00836345
13	58.0@5.9515357	58	0.00789026	0.00772356
14	73.0@10.684782	73	0.00100666	0.000672334
15	43.0@9.931848	43	0.0012959	0.000737793
16	174.0@14.163119	174	0.014177	0.0112313
17	55.0@35.0677	55	0.0190199	0.0175673
19	73.0@18.396383	73	0.00202079	0.000457535
20	73.0@7.7168717	73	0.00682459	0.00412521
21	174.0@12.5713825	174	0.0109373	0.00699967
22	75.0@11.079557	75	0.000369267	0.000146046
23	152.0@6.3491044	152	0.0117982	0.0116661
24	73.0@6.6297216	73	0.00744292	0.00856254
25	73.0@8.354536	73	0.000749621	0.000474495
26	43.0@7.197967	43	0.00185822	0.00335725
27	73.0@30.509201	73	0.00228499	0.00228359
28	263.0@14.883278	263	0.00255367	0.0023187
29	174.0@13.853941	174	0.00404513	0.00347054
30	43.0@5.647514	43	0.000838817	0.00104954
33	221.0@10.575172	221	0.00158963	0.0021904
34	73.0@7.598434	73	0.00147426	0.00172683
35	73.0@26.268785	73	0.00303303	0.00333915
36	73.0@23.712852	73	0.000965107	0.005578
37	73.0@6.4012113	73	0.00160033	0.00122391
38	43.0@13.70141	43	0.000830867	0.000803246
39	117.0@19.54509	117	0.000833912	0.00072211
40	73.0@9.171587	73	0.00143489	0.00201177
41	73.0@8.334924	73	0.000314321	0.000270451
46	73.0@23.561821	73	0.000970695	0.000811328
47	314.0@30.132603	314	0.00173402	0.0015425
49	73.0@36.46103	73	0.00136753	0.00154762
53	73.0@8.76078	73	0.00195791	0.00169576
55	152.0@8.086113	152	0.000649013	0.00217695
59	43.0@18.483063	43	0.000485254	0.000519913
60	71.0@6.1472	71	0.00189081	0.000259562
61	57.0@33.555077	57	0.000560288	0.000483814
63	43.0@9.839468	43	0.000171761	0.000330397
66	73.0@6.722466	73	0.000382124	0.000237564
68	57.0@22.69016	57	0.000152533	0.000141096
70	57.0@31.5853	57	0.000383245	0.000262532
71	57.0@28.195871	57	0.000212213	0.000187029
73	43.0@14.654487	43	0.000405766	0.000693605
74	43.0@10.458066	43	0.000515084	0.000606882
75	57.0@9.281615	57	0.000138846	0.000179241
77	43.0@12.208961	43	5.15574e-05	0.000241911
78	174.0@9.583596	174	0.000178927	8.53866e-05
80	73.0@13.754696	73	0.000125197	7.07711e-05
81	73.0@14.261043	73	0.000148436	0.000222284
82	73.0@17.504173	73	4.81108e-05	0.000226153
83	73.0@19.80453	73	0.00027069	0.000235728
85	73.0@7.99086	73	0.00177498	0.00113937
86	286.0@26.059742	286	0.000108888	9.49392e-05
87	73.0@24.087122	73	0.000316934	0.00092347
88	57.0@24.411356	57	0.000223224	0.000228919
90	57.0@18.248264	57	0.000246063	4.25059e-05
331	73.0@29.091236	73	3.69427e-05	3.9893e-05
360	281.0@5.943813	281	5.81771e-05	3.80959e-05
371	57.0@29.521132	57	5.03232e-05	6.6808e-05
388	73.0@27.676918	73	5.0644e-05	3.81607e-05
407	56.0@33.36112	56	0.000151118	7.83692e-05
408	57.0@35.41796	57	5.53425e-05	4.91855e-05
444	57.0@27.965117	57	4.24613e-05	6.01069e-05
449	43.0@9.2880335	43	4.41786e-05	0.000203144
450	57.0@36.397648	57	0.000170628	0.00014978
455	73.0@15.154768	73	8.53347e-05	2.7289e-05
456	154.0@5.1232867	154	0.000153583	0.00034124
465	73.0@14.994955	73	7.29002e-05	3.93932e-05
471	373.0@12.327319	373	1.33156e-05	2.49787e-05
479	73.0@17.66594	73	5.56653e-05	9.36744e-05
485	57.0@37.51285	57	0.000193415	0.000202823
502	73.0@36.07694	73	0.000168492	0.000171345
520	43.0@12.798592	43	5.90038e-05	9.53744e-05
525	57.0@23.445066	57	0.000422338	0.000339387
526	71.0@6.0151362	71	0.000176995	0.000176708
544	73.0@10.833455	73	0.00015415	0.000132045
552	73.0@38.262714	73	0.000180649	0.000146446
574	73.0@10.969527	73	0.000279238	5.63242e-05
580	342.0@33.91431	342	0.000191516	0.000137284
583	57.0@17.0925	57	0.000103058	0.000196036
584	43.0@7.305077	43	0.000192136	0.000123386
586	73.0@18.026043	73	2.69896e-05	6.59602e-05
591	57.0@27.368372	57	0.000163512	3.95058e-05
597	73.0@9.612103	73	0.000353124	0.000288242
604	207.0@6.203469	207	0.0002413	0.000155491
613	43.0@8.795897	43	0.000365633	0.000104293
614	57.0@8.679916	57	0.000313564	0.000373603
615	73.0@11.763818	73	0.000194108	4.26878e-05
620	73.0@7.0643125	73	0.000471827	0.000250726
621	73.0@9.016701	73	0.000334273	0.000167766
625	73.0@8.186379	73	0.00095115	0.00112102
635	73.0@6.8818173	73	0.000439161	0.000638124
636	267.0@7.747348	267	2.50809e-05	7.28357e-05
638	73.0@34.963795	73	0.000397717	0.000368466
642	73.0@11.289798	73	0.000411604	0.000287048
645	73.0@38.683224	73	0.00096991	0.000920168
651	77.0@9.263346	77	5.91291e-05	5.28462e-05
654	258.0@21.825472	258	0.000390078	0.000478654
659	73.0@11.579227	73	0.000392242	0.000313393
666	57.0@18.686945	57	5.13203e-05	3.97491e-05
667	55.0@5.794811	55	0.000958088	0.000706171
669	77.0@5.1648636	77	0.000421965	0.000580782
670	73.0@8.734379	73	0.000477355	0.00021527
671	75.0@8.142501	75	0.000369989	0.000722421
673	136.0@6.2032356	136	0.000219855	0.000559264
674	43.0@5.5691457	43	0.000991434	0.00191165
675	43.0@10.121616	43	0.0003478	0.000289942
679	73.0@6.541445	73	0.00129629	0.000268174
686	174.0@21.687126	174	9.3001e-05	0.000350121
688	73.0@5.5448523	73	0.000401576	0.00032347
694	57.0@17.76166	57	0.000224841	9.22627e-05
696	73.0@15.644144	73	0.000462147	2.58476e-05
701	57.0@12.987432	57	0.00038413	0.000674244
711	43.0@8.560501	43	0.000394304	0.000377102
712	59.0@5.4335804	59	0.000933105	0.000615828
714	73.0@13.56305	73	0.000948206	0.000751623
717	73.0@10.279642	73	0.000897395	0.0002934
726	77.0@5.1240435	77	0.00043042	0.000546456
728	174.0@19.405396	174	0.00111522	0.000469643
734	73.0@7.8497834	73	0.000172435	0.000441141
738	75.0@7.900483	75	0.000698825	0.000675317
740	73.0@6.7514243	73	0.00143411	0.00133966
745	73.0@7.9103813	73	0.00140195	0.000365015
754	73.0@6.588087	73	0.000866109	0.000491729
755	73.0@7.288962	73	0.000236853	0.00052219
757	73.0@6.489694	73	0.000980027	0.00154832
758	73.0@10.292729	73	0.00197419	0.00184
762	43.0@7.046031	43	0.000663019	0.000309646
765	73.0@6.3520436	73	0.00182984	0.00101404
769	116.0@7.190636	116	0.0015087	0.000621978
777	73.0@5.423037	73	0.00231765	0.00176558
779	174.0@16.801199	174	0.00298221	0.0015946
784	43.0@6.0804644	43	0.00427831	0.00183587
785	43.0@6.553277	43	0.000472739	0.000168661
787	56.0@5.3835	56	0.00886942	0.00838458
793	58.0@5.26137	58	0.0116774	0.0140527
796	73.0@6.2662024	73	0.0116328	0.00877636
797	73.0@5.32855	73	0.00271711	0.00458863
800	73.0@5.6738715	73	0.0380064	0.0261295
893	146.0@5.212068	146	0.612504	0.646359
